# Supplementary material for: Genome re-sequencing reveals the evolutionary history of peach fruit edibility
Source: PubMed Central journal article supplement (PMC6302090; doi:10.1038/s41467-018-07744-3), 2018-12-20
Supplement: 41467_2018_7744_MOESM1_ESM.pdf [file 41467_2018_7744_MOESM1_ESM.pdf]

## **Genome re-sequencing reveals the evolutionary history of peach fruit edibility**

Yu et al.

## Supplementary Figures

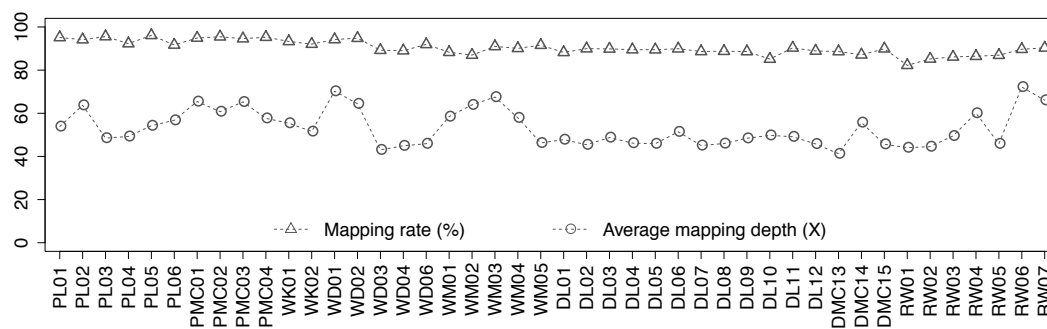

**Supplementary Figure 1** The distribution of the mapping rate and final effective mapping depth for each accession. For each accession, the mapping rate ranged from 82.24% to 96.11% and the final effective mapping depth ranged from 41.25× to 72.18×.

a

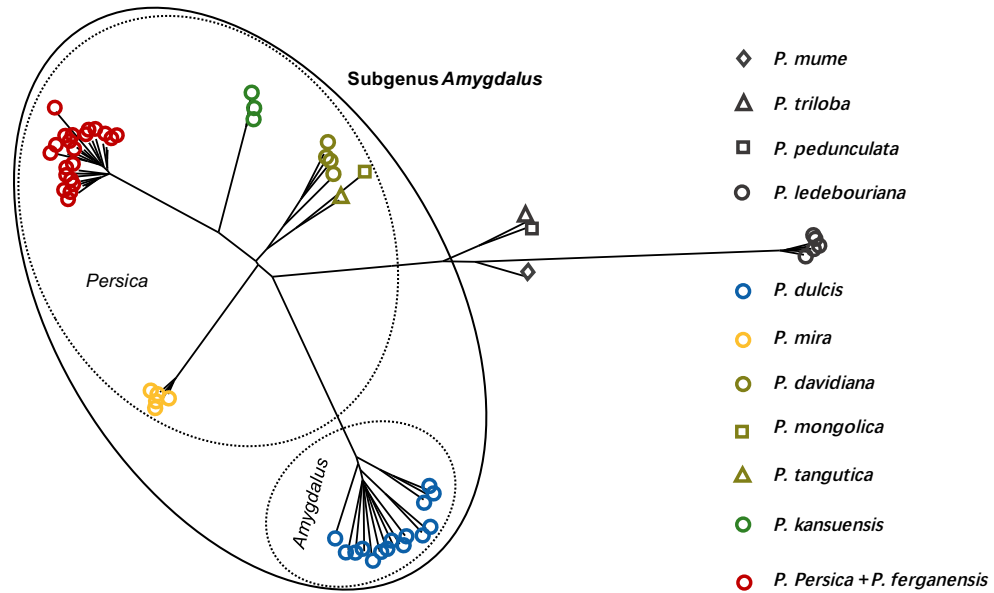

b

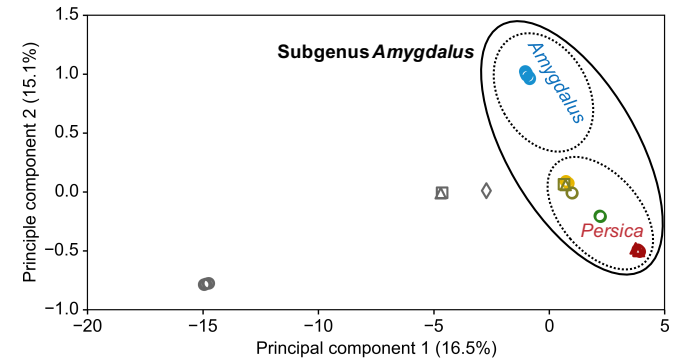

**Supplementary Figure 2** A neighbor-joining (NJ) tree analysis (a) and principal component analysis (PCA) (b) of 58 cultivated peaches and their closely related relatives, as well as *P. mume* (belonging to the genus *Prunus* subgenus *Prunus*) based on 3,909,617 whole-genome SNPs (MAF > 10%, missing rates ≤ 5%). The length of branches indicates simple matching distance. The NJ tree clearly excluded *P. ledebouriana*, *P. triloba*, and *P. pedunculata*, as well as *P. mume*, from subg. *Amygdalus*, and classified *P. tangutica* and *P. mongolica* into the *Persica* section of subg. *Amygdalus*. The pattern was further supported by PCA.

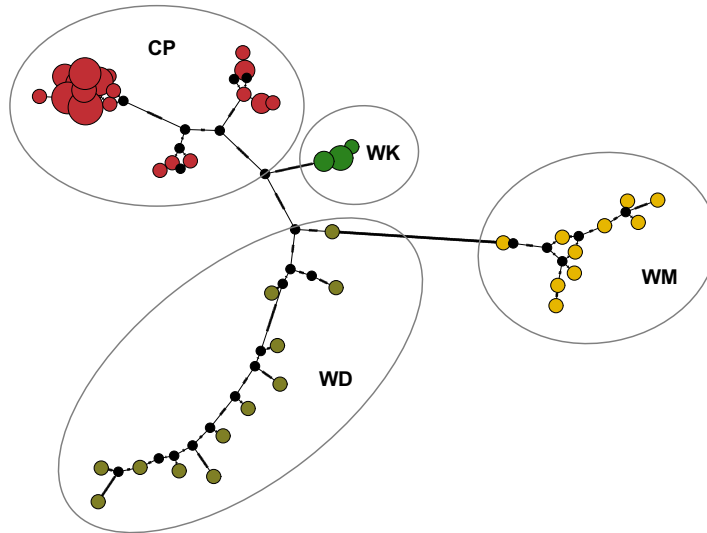

**Supplementary Figure 3** Median joint network analysis based on a large haplotype (Pp08, 13449595–13547914; size: 98.32 kb) shared among cultivated and wild relative peaches. Nodes representing haplotypes are colored according to the defined WM, WD, WK, and CP groupings of accessions. Node size and parallel lines on branches are shown in proportion to haplotype frequency and to the extent of mutations, respectively.

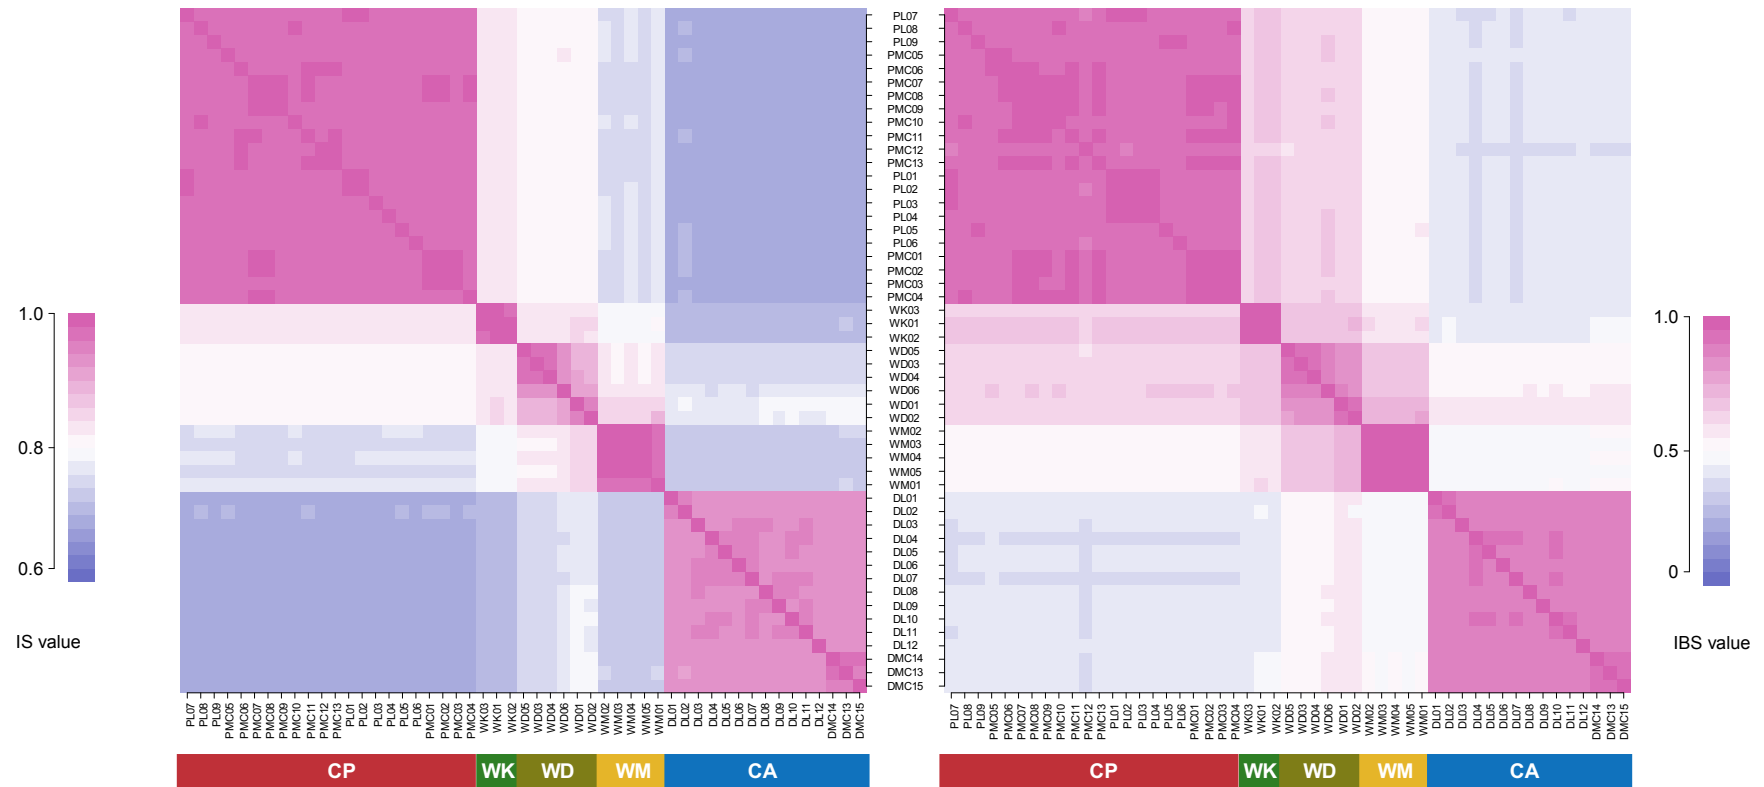

**Supplementary Figure 4** Identity score (IS) and identity-by-state (IBS) analyses for the 51 *Amygdalus* accessions. The IS and IBS values of each pair accessions in the same grouping were much higher than those of the pairs in other groupings.

**a**

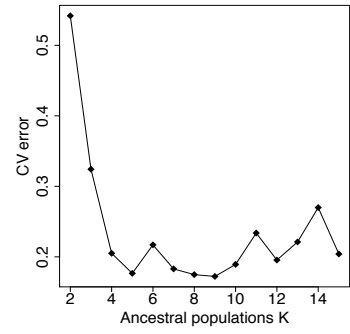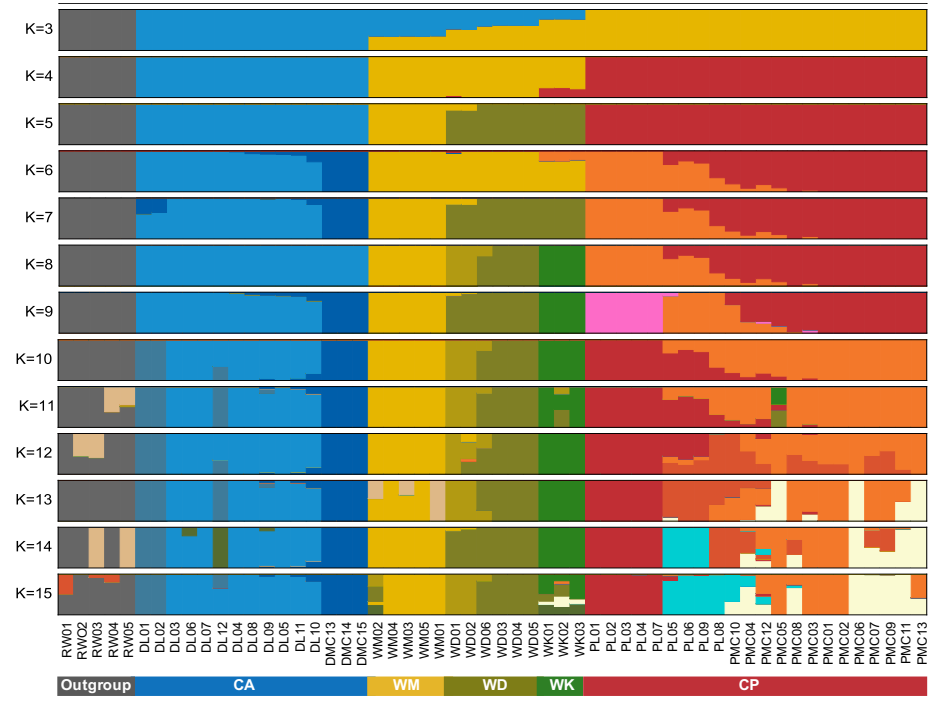

**b**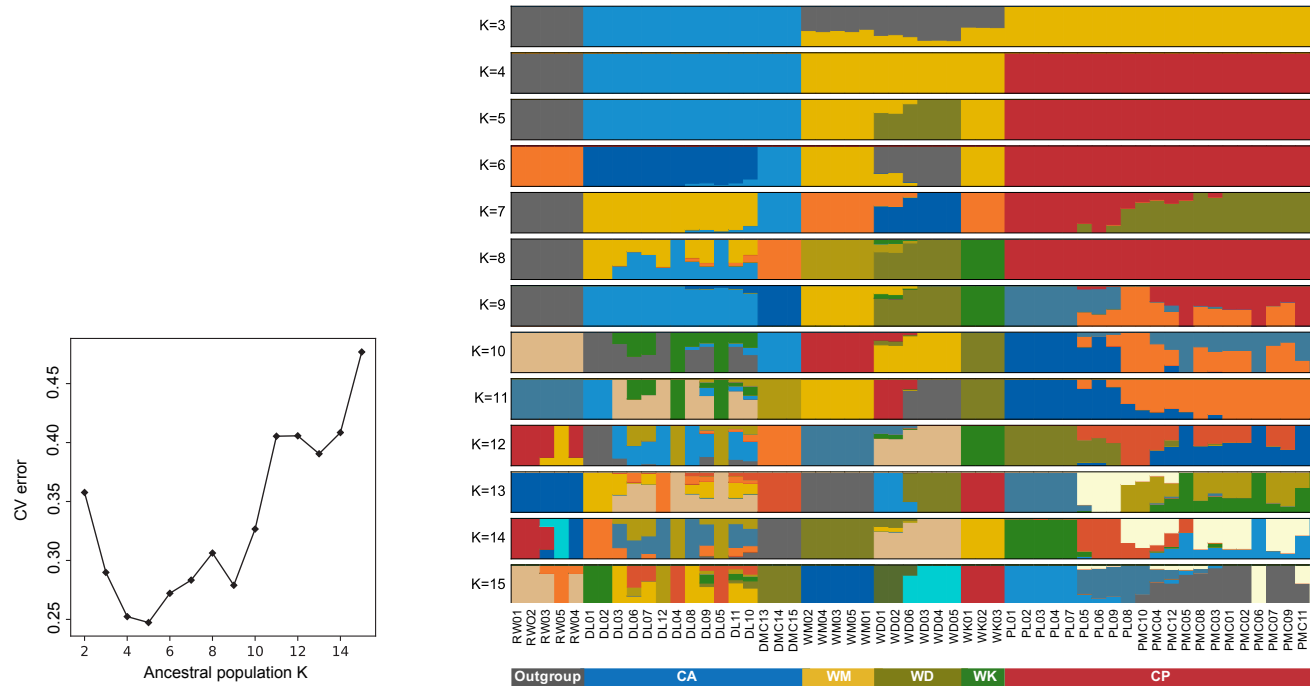

**Supplementary Figure 5** Model-based clustering analyses for the 51 *Amygdalus* accessions using *P. ledebouriana* as the outgroup. **(a)** Cross validation (CV) error under different ancestral populations, and the model-based clustering ( $K = 3$  to 15) are shown. A unique grouping containing all the *P. ferganensis* accessions (marked with pink color) ( $K = 9$ ) that were clustered with the *P. persica* landraces from north China ( $K = 8$ ) was identified. **(b)** We further performed this analysis with filtered SNPs by testing HWE violations ( $P > 10^{-4}$ ); depicted is the CV error and the model-based clustering result ( $K = 3$  to 15). This result ( $K = 9$ ) further supported the grouping patterns that we had identified based on the NJ tree; the *P. ferganensis* accessions were clustered with the *P. persica* landraces from north China ( $K = 7$ ).

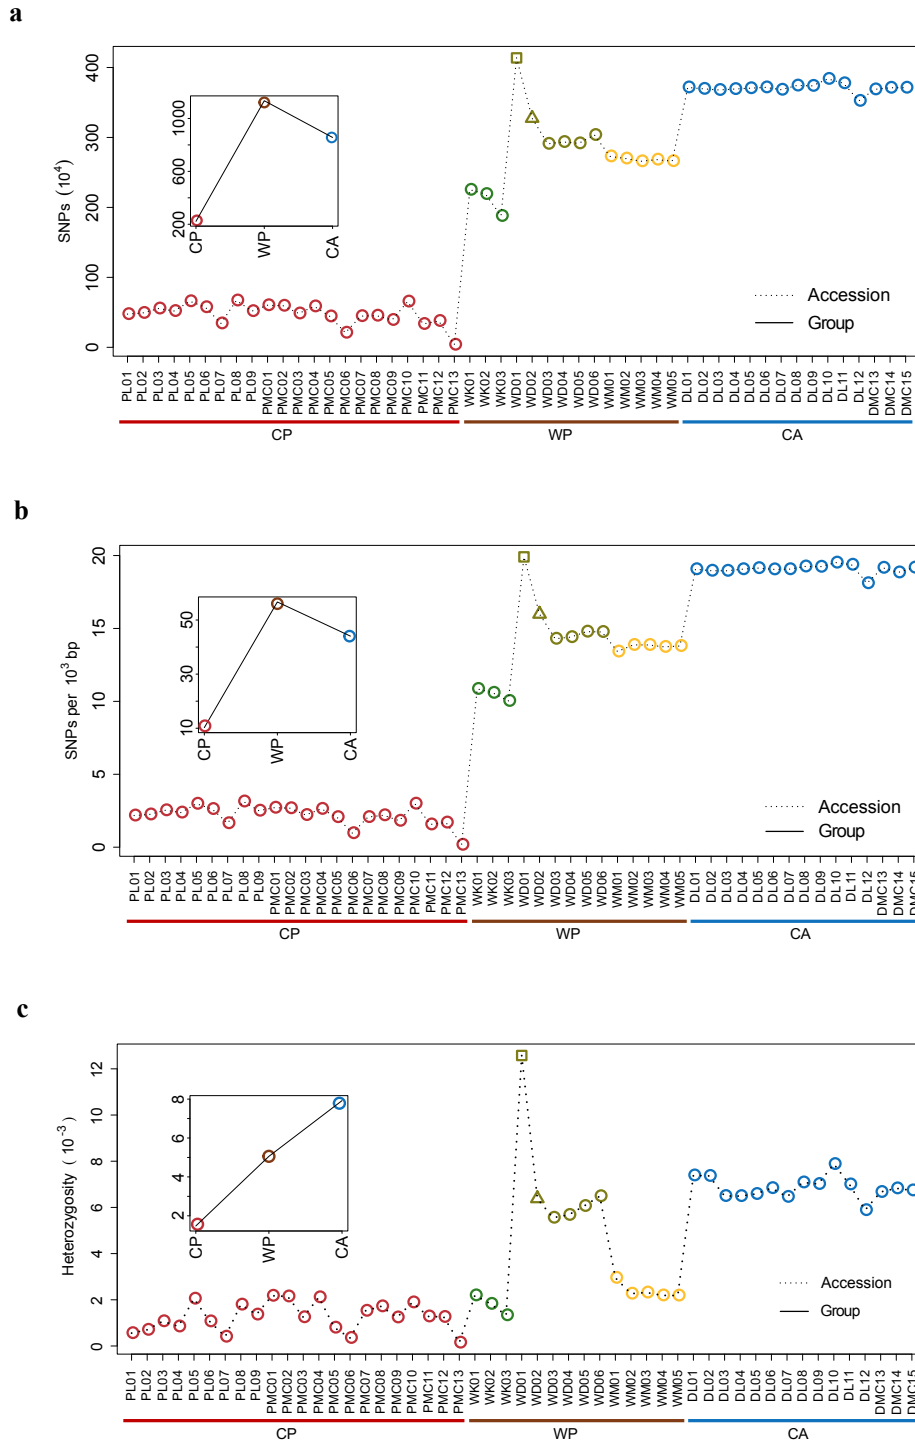

**Supplementary Figure 6** Number, frequency and heterozygosity statistics of SNPs for each accession in cultivated peaches (CP), wild relative peaches (WP = WM + WD + WK), and cultivated almonds (CA), and their group levels. **(a)** Number of SNPs; **(b)** Frequency of SNPs per kb; **(c)** Heterozygosity.



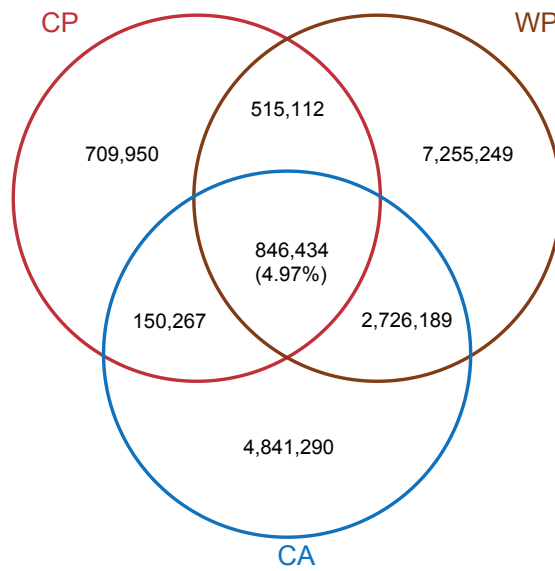

**Supplementary Figure 7** Venn diagrams showing the number of common and unique SNPs in the CP, WP, and CA groups. Fewer than ~5% of SNPs were common to all the three groups.

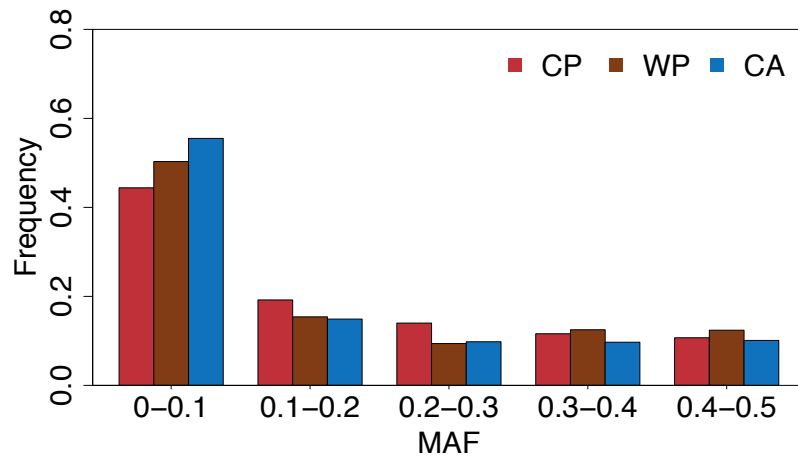

**Supplementary Figure 8** Minor allele frequency (MAF) distributions of SNPs in cultivated peaches (CP), wild relative peaches (WP) and cultivated almonds (CA). The proportion of MAF <0.1 was the lowest in cultivated peaches.

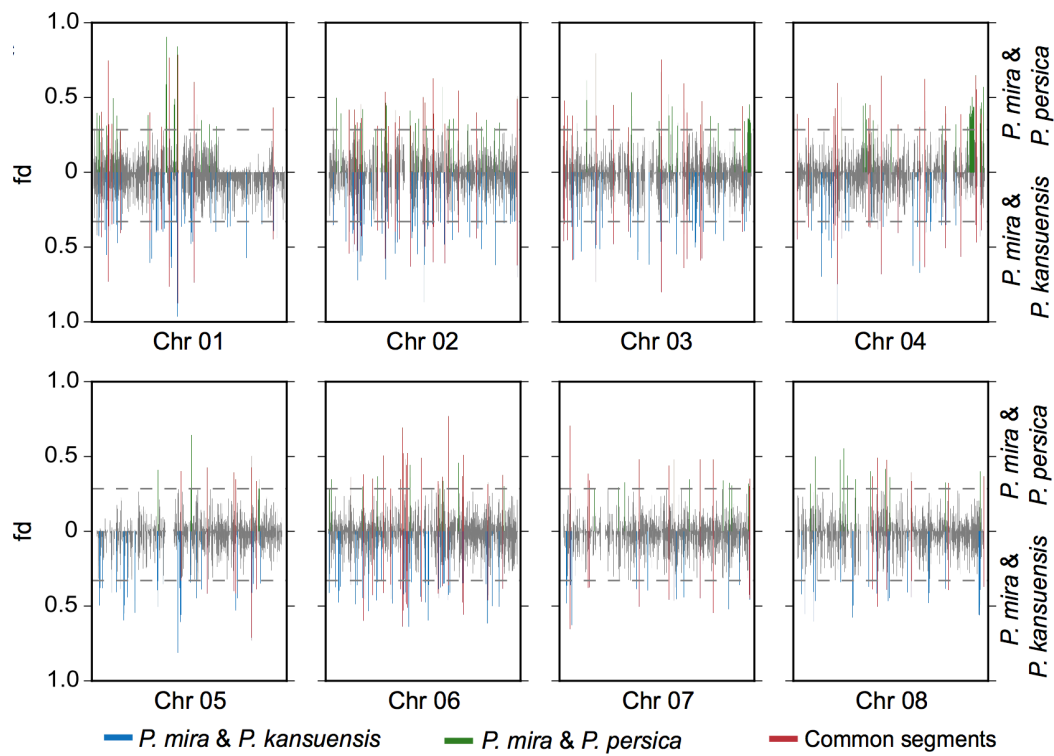

**Supplementary Figure 9** Manhattan plots of introgressed segments across all eight chromosomes. Introgressed signatures with significantly positive  $D$  statistic values (20 kb sliding windows, 5% empirical distribution) between *P. mira* and *P. kansuensis*, and between *P. mira* and *P. persica* are colored in blue and green, respectively. Common introgressed segments with significantly positive  $D$  statistic values are colored in red.

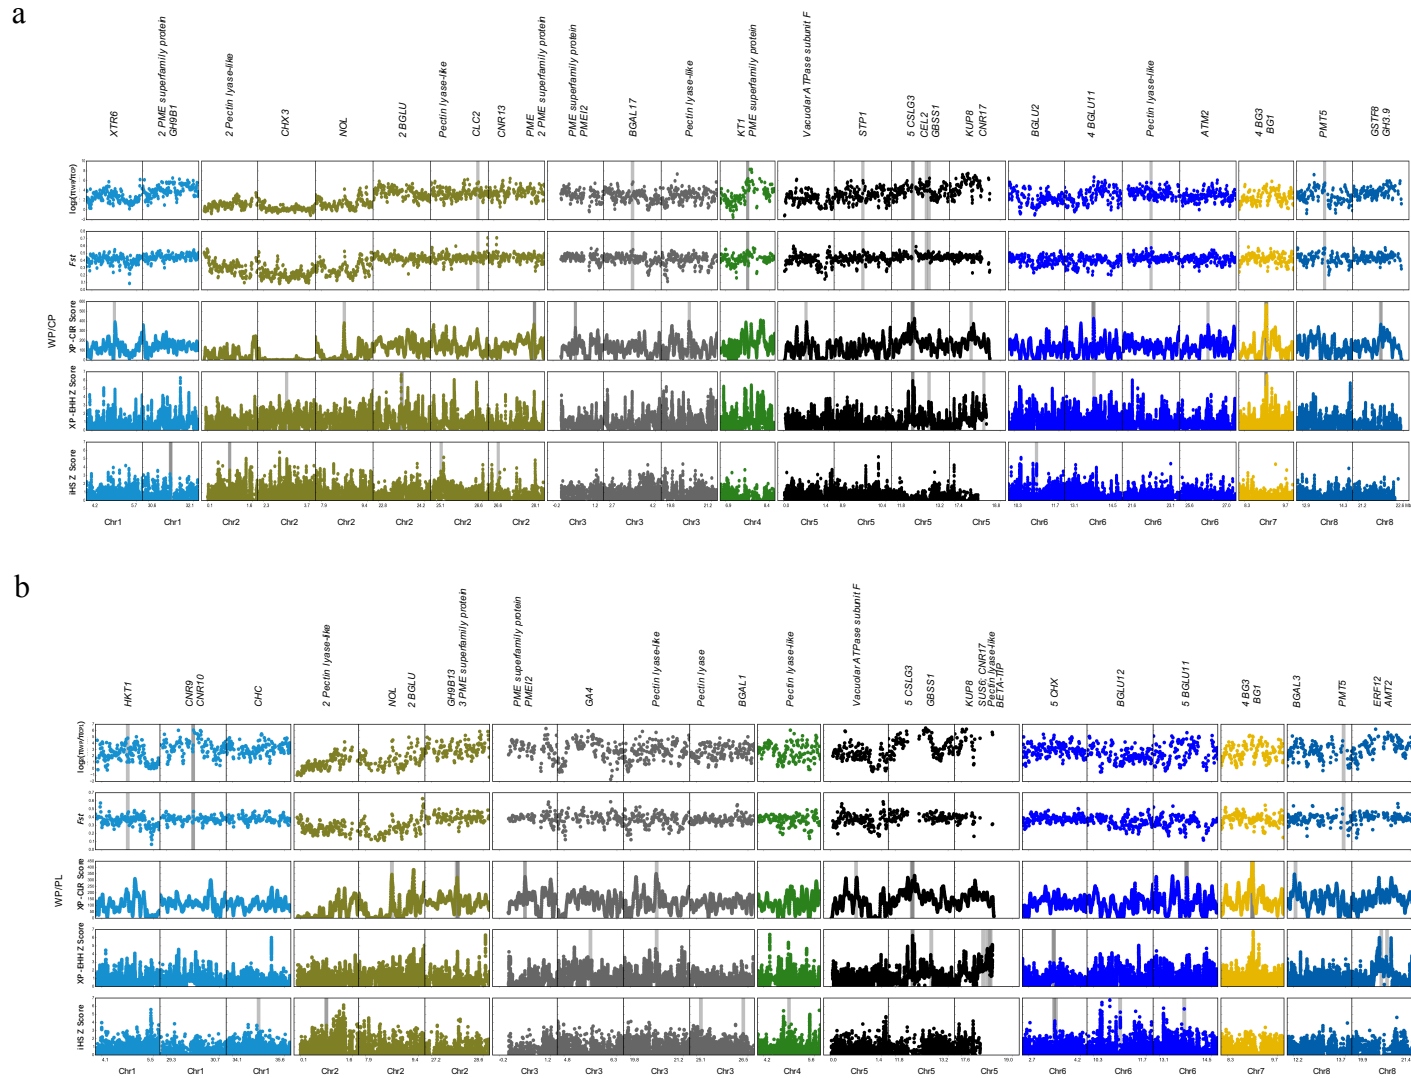

**Supplementary Figure 10** Genome-wide selection regions and candidate genes involved in fruit edibility. Positive selection signatures in a comparison of the CP group and the WP group (**a**), and in comparison of PL subgroup and WP group (**b**) are showed in panels presenting distinct selection metrics including  $F_{ST}$  &  $\theta\pi$  ratio, XP-CLR, XP-EHH, and iHS, respectively. Fruit edibility associated candidate genes are visualized.

a

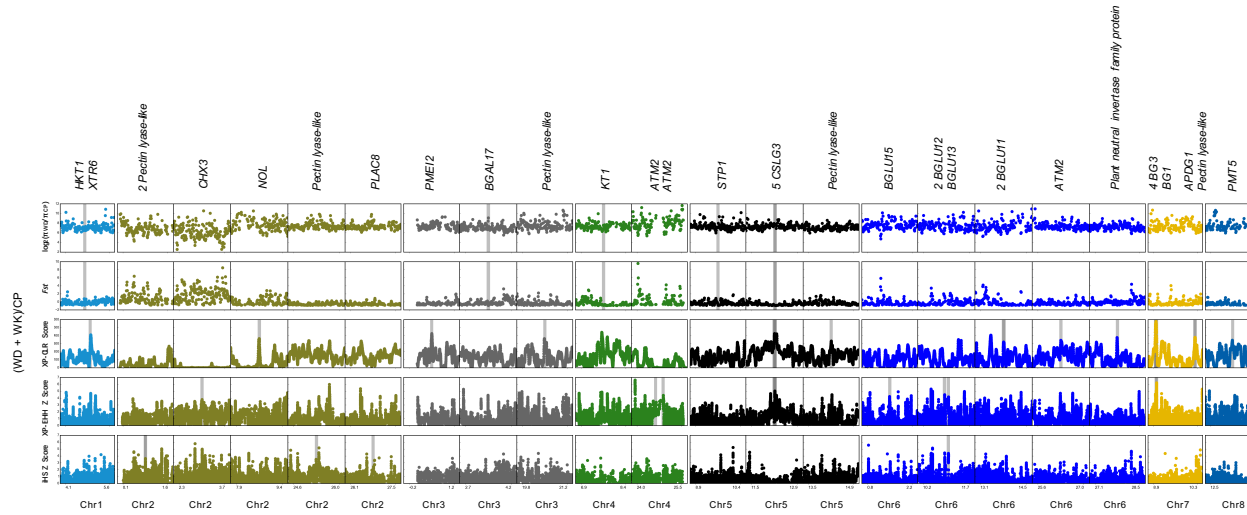

b

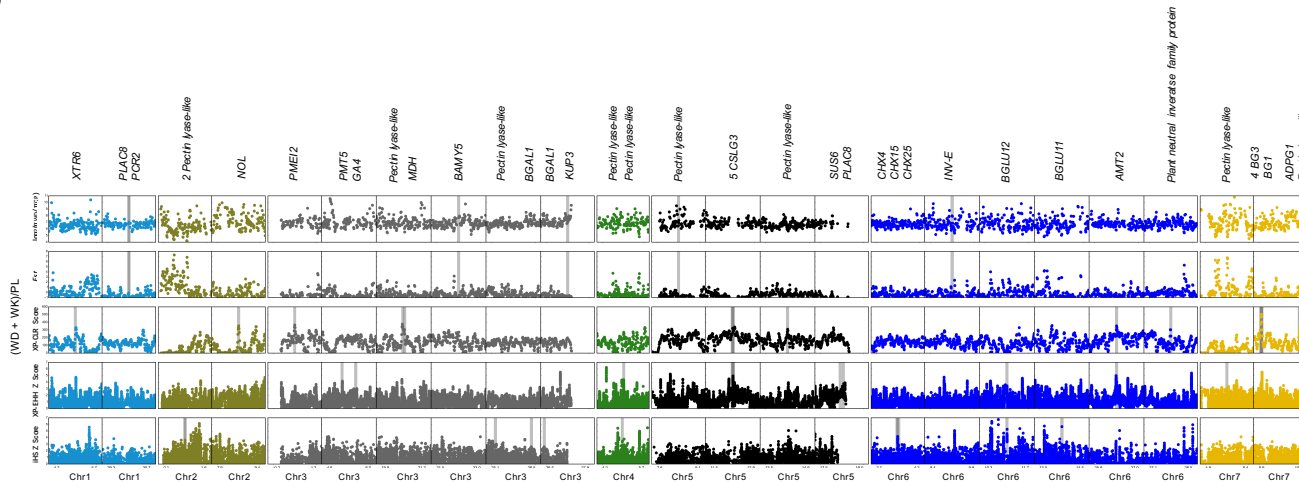

**Supplementary Figure 11** Genome-wide selection regions and candidate genes involved in fruit edibility. Positive selection signatures in a comparison of the CP group and the (WD + WK) group (**a**), and in comparison of PL subgroup and (WD + WK) group (**b**) are showed in panels presenting distinct selection metrics including  $F_{ST}$  &  $\theta\pi$  ratio, XP-CLR, XP-EHH, and iHS, respectively. Fruit edibility associated candidate genes are visualized.

**a**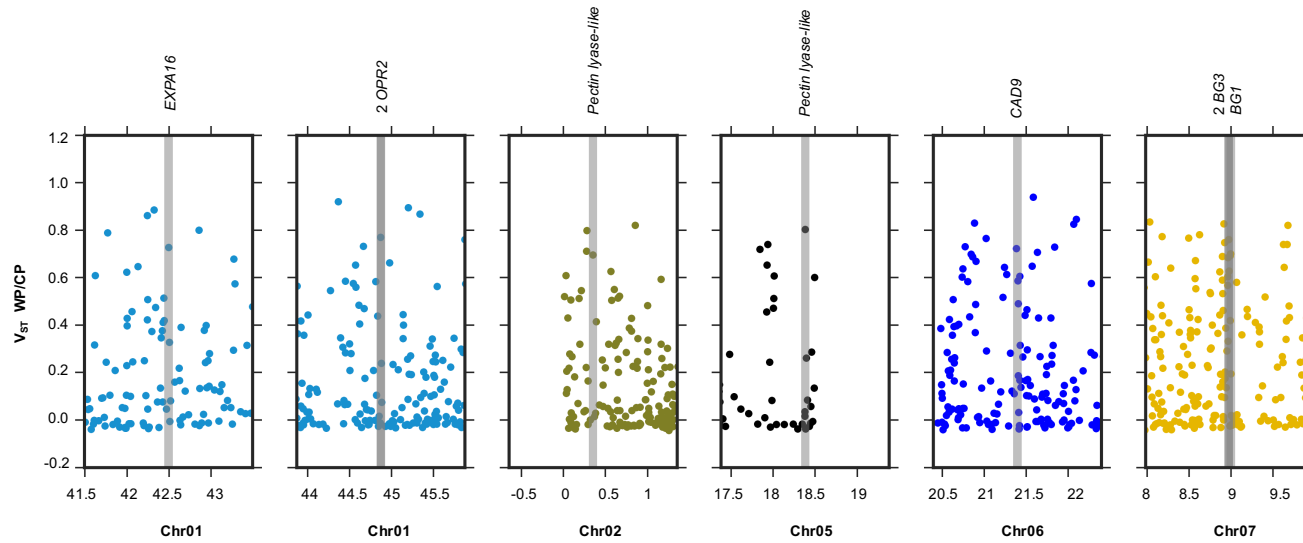**b**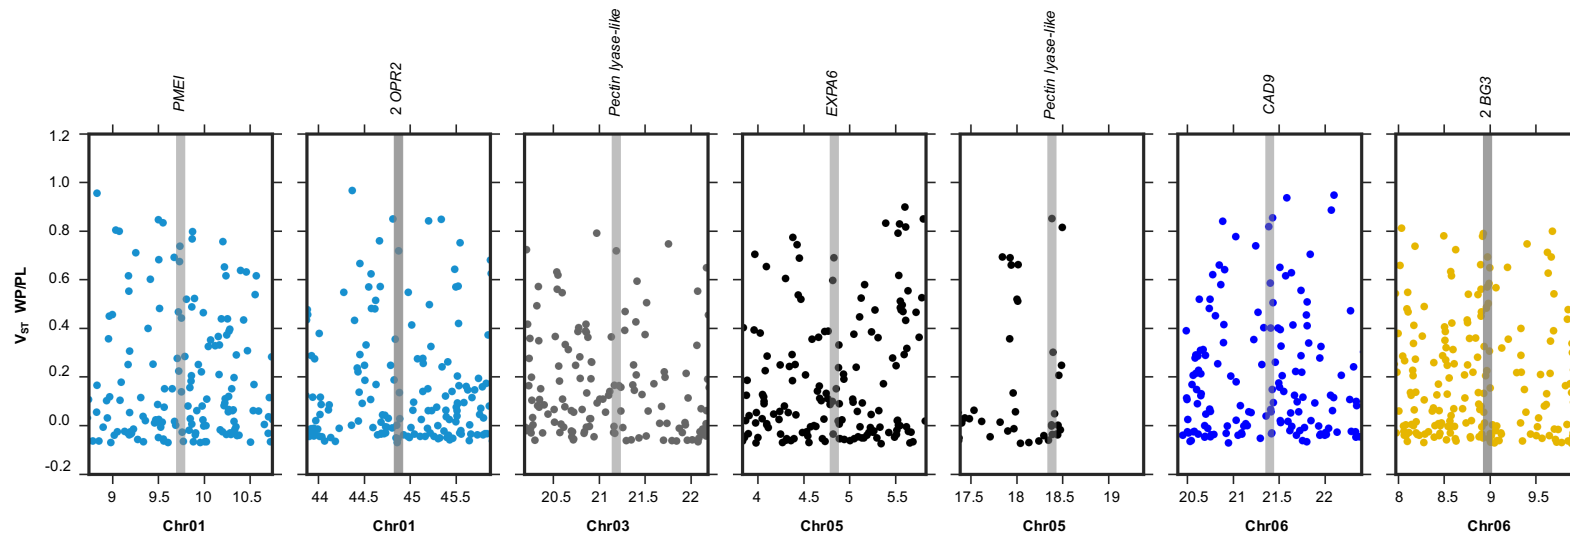

**Supplementary Figure 12** Genome-wide selected copy number variations (CNVs) related to fruit edibility. Manhattan plots of  $V_{ST}$  values for positive selection signatures in a comparison of the CP group and the WP group (a), and in a comparison of PL subgroup and the WP group (b). Fruit edibility associated candidate genes are visualized with shadows.

**a**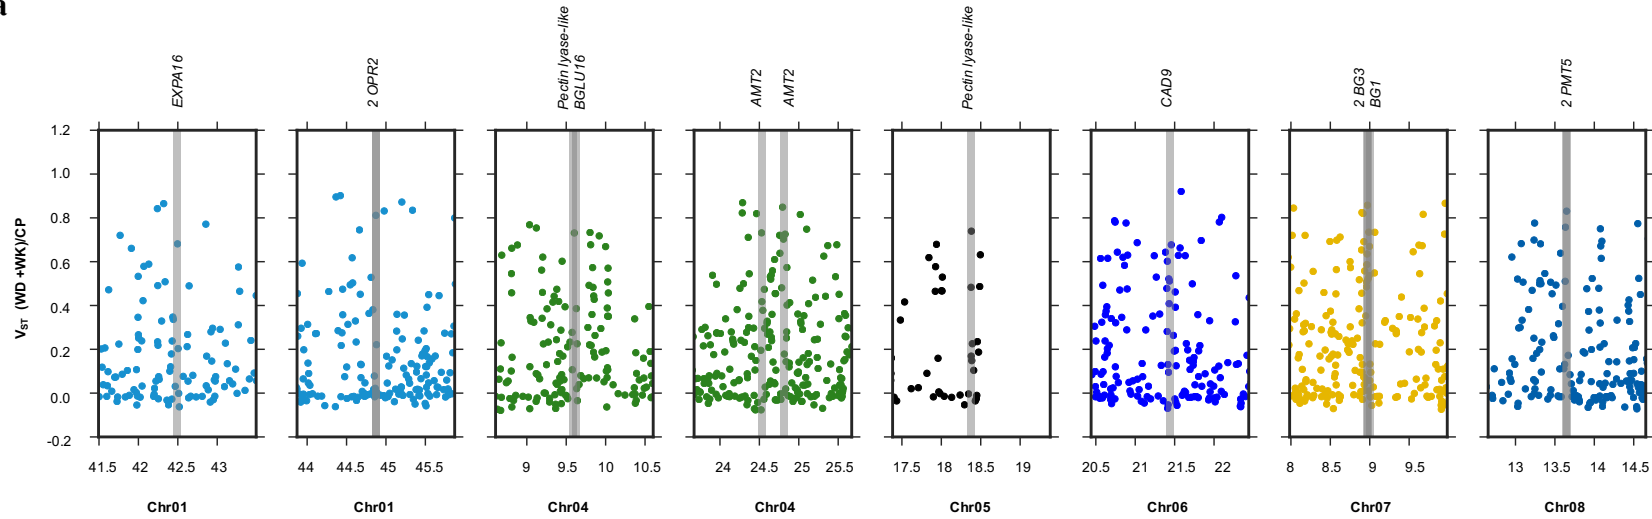**b**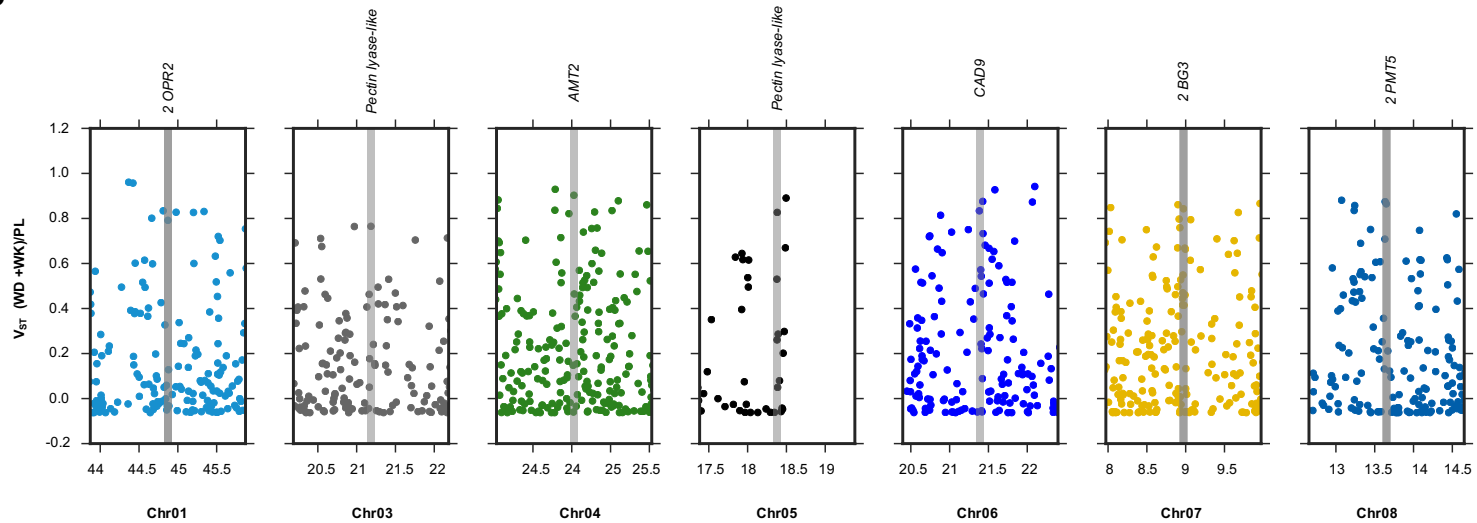

**Supplementary Figure 13** Genome-wide selected copy number variations (CNVs) related to fruit edibility. Manhattan plots of  $V_{ST}$  values for positive selection signatures in a comparison of the CP group and the (WD + WK) group (a), and in a comparison of PL subgroup and the (WD + WK) group (b). Fruit edibility associated candidate genes are visualized with shadows.

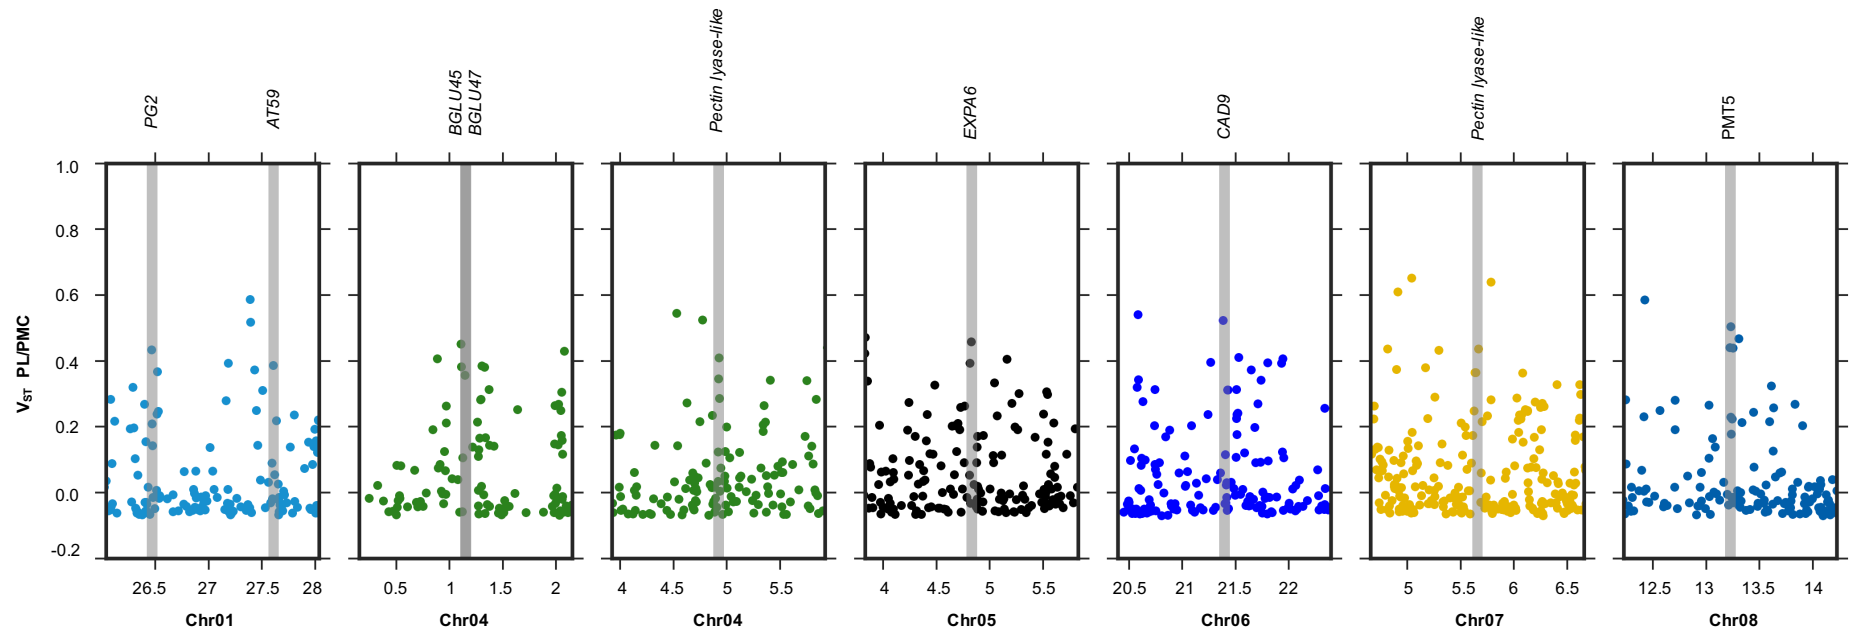

**Supplementary Figure 14** Genome-wide selected copy number variations (CNVs) related to fruit edibility. Manhattan plots of  $V_{ST}$  values showing positive selection signatures in a comparison of the PL subgroup and the PMC subgroup. Fruit edibility associated candidate genes are visualized with shadows.



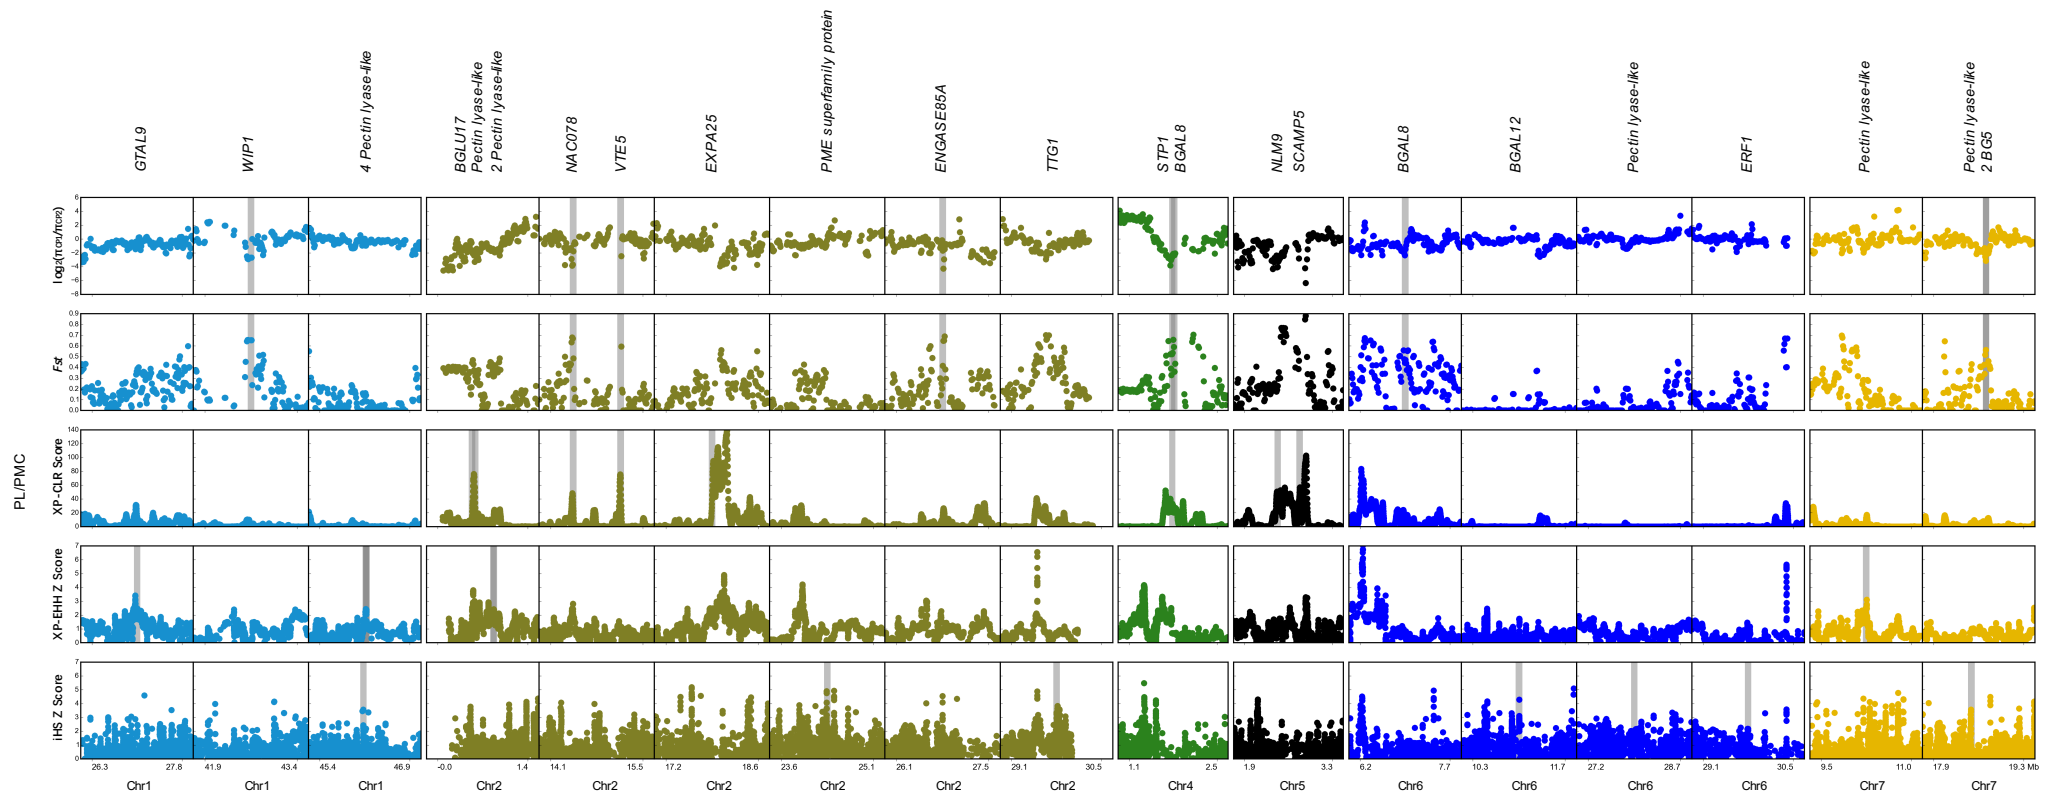

**Supplementary Figure 15** Genome-wide selection regions and candidate genes involved in fruit edibility. Positive selection signatures in comparison of the PL subgroup and the PMC subgroup are shown in separate panels presenting distinct selection metrics including  $F_{ST}$  &  $\theta\pi$  ratio, XP-CLR, XP-EHH, and iHS. Fruit edibility associated candidate genes are visualized.





Supplementary Table 2 Sequencing quality of the 44 cultivated peaches and closely relative species sequenced in this study.

| Section                                   | Group                      | Sample code | SRA code   | Species                                   | Common name         | Origin              | Raw bases (bp)  | High-quality data |                    |                       |                       |                      |
|-------------------------------------------|----------------------------|-------------|------------|-------------------------------------------|---------------------|---------------------|-----------------|-------------------|--------------------|-----------------------|-----------------------|----------------------|
|                                           |                            |             |            |                                           |                     |                     |                 | Clean data (bp)   | Effective rate (%) | Proportion of Q20 (%) | Proportion of Q30 (%) | Proportion of GC (%) |
| Cultivated peaches (10)                   |                            | PL01        | SRS1272175 | <i>P. ferganensis</i>                     | Kashi 2             | Xinjiang, PRC       | 14,637,205,200  | 13,499,904,400    | 92.23              | 93.35                 | 83.75                 | 38.35                |
|                                           |                            | PL02        | SRS1272177 | <i>P. ferganensis</i>                     | Kashi You Tao       | Xinjiang, PRC       | 17,492,916,000  | 16,230,045,800    | 92.78              | 93.91                 | 84.78                 | 38.11                |
|                                           |                            | PL03        | SRS1272178 | <i>P. ferganensis</i>                     | Xinjiang Pan Tao    | Xinjiang, PRC       | 12,963,801,800  | 12,007,731,200    | 92.63              | 93.83                 | 84.65                 | 38.08                |
|                                           |                            | PL04        | SRS1272179 | <i>P. ferganensis</i>                     | Pan Tao (Weihai)    | Shandong, PRC       | 13,704,460,000  | 12,676,468,200    | 92.50              | 93.62                 | 84.25                 | 38.06                |
|                                           |                            | PL05        | SRS1272180 | <i>P. persica</i>                         | Mao Tao (Luanchuan) | Henan, PRC          | 14,371,401,600  | 13,279,922,800    | 92.41              | 93.28                 | 83.53                 | 37.91                |
|                                           |                            | PL06        | SRS1272185 | <i>P. persica</i>                         | You Tao (Jiyuan)    | Henan, PRC          | 15,822,965,600  | 14,686,102,800    | 92.82              | 93.83                 | 84.60                 | 37.59                |
|                                           |                            | PMC01       | SRS1272190 | <i>P. persica</i>                         | Sunplash_1          | USA                 | 16,690,751,750  | 16,452,556,000    | 98.57              | 92.75                 | 86.89                 | 38.55                |
|                                           |                            | PMC02       | SRS1272192 | <i>P. persica</i>                         | Sunplash_2          | USA                 | 15,914,978,200  | 15,255,370,400    | 95.86              | 96.19                 | 89.56                 | 39.33                |
|                                           |                            | PMC03       | SRS1272193 | <i>P. persica</i>                         | Sunblaze            | USA                 | 16,716,918,000  | 16,446,503,750    | 98.38              | 92.42                 | 86.30                 | 39.03                |
|                                           |                            | PMC04       | SRS1272194 | <i>P. persica</i>                         | Rui Pan 18          | Beijing, PRC        | 14,618,880,000  | 14,446,430,000    | 98.82              | 92.35                 | 86.30                 | 37.89                |
| Persica                                   | Wild relative peaches (12) | WK01        | SRS1272209 | <i>P. kansuensis</i>                      | Bai Gen Gan Su Tao  | Gansu, PRC          | 15,508,995,000  | 14,449,758,400    | 93.17              | 93.90                 | 84.59                 | 37.97                |
|                                           |                            | WK02        | SRS1272211 | <i>P. kansuensis</i>                      | Hong Gen Gan Su Tao | Gansu, PRC          | 14,691,289,200  | 13,589,577,000    | 92.50              | 93.67                 | 84.30                 | 38.05                |
|                                           |                            | WD01        | SRS2510354 | <i>P. mongolica</i>                       | Meng Gu Bian Tao    | Inner Mongolia, PRC | 19,730,858,200  | 18,947,543,800    | 96.03              | 95.05                 | 87.12                 | 38.39                |
|                                           |                            | WD02        | SRS2510355 | <i>P. tangutica</i>                       | Xi Kang Bian Tao    | Gansu, PRC          | 17,069,870,400  | 16,309,083,000    | 95.54              | 95.16                 | 87.46                 | 38.18                |
|                                           |                            | WD03        | SRS1272212 | <i>P. davidiana</i>                       | Bai Hua Shan Tao    | Northern China, PRC | 12,745,492,200  | 11,750,996,000    | 92.20              | 93.53                 | 84.15                 | 38.14                |
|                                           |                            | WD04        | SRS1273502 | <i>P. davidiana</i>                       | Hong Hua Shan Tao   | Northern China, PRC | 13,242,335,600  | 12,271,064,400    | 92.67              | 93.73                 | 84.36                 | 37.76                |
|                                           | Wild relative peaches (12) | WD06        | SRS1273503 | <i>P. davidiana</i> var. <i>potaninii</i> | Shan Gan Shan Tao   | Shaanxi, PRC        | 13,010,170,000  | 12,002,606,200    | 92.26              | 93.32                 | 83.60                 | 37.79                |
|                                           |                            | WM01        | SRS1273504 | <i>P. mira</i>                            | Guang He Tao        | Tibet, PRC          | 17,344,556,400  | 16,092,350,600    | 92.78              | 93.91                 | 84.75                 | 37.77                |
|                                           |                            | WM02        | SRS1270597 | <i>P. mira</i>                            | Guang He Tao        | Tibet, PRC          | 20,650,891,500  | 20,597,688,300    | 99.74              | 95.59                 | 90.34                 | 40.24                |
|                                           |                            | WM03        | SRS1270602 | <i>P. mira</i>                            | Guang He Tao        | Tibet, PRC          | 23,818,603,200  | 23,732,653,200    | 99.64              | 96.88                 | 92.98                 | 41.88                |
|                                           |                            | WM04        | SRS1270603 | <i>P. mira</i>                            | Guang He Tao        | Tibet, PRC          | 18,307,178,100  | 18,190,469,400    | 99.36              | 95.29                 | 89.83                 | 39.91                |
|                                           |                            | WM05        | SRS1270605 | <i>P. mira</i>                            | Guang He Tao        | Tibet, PRC          | 15,846,738,300  | 15,761,688,600    | 99.46              | 96.83                 | 92.91                 | 40.11                |
| Amygdalus                                 | Cultivated almonds (15)    | DL01        | SRS1273505 | <i>P. dulcis</i>                          | Shuang Guo          | Xinjiang, PRC       | 14,700,002,750  | 14,544,182,750    | 98.94              | 93.39                 | 87.95                 | 38.46                |
|                                           |                            | DL02        | SRS1273506 | <i>P. dulcis</i>                          | Zhi Pi              | Xinjiang, PRC       | 13,233,459,250  | 13,087,891,250    | 98.90              | 92.87                 | 87.09                 | 38.10                |
|                                           |                            | DL03        | SRS1273507 | <i>P. dulcis</i>                          | Gong Ba Dan         | Xinjiang, PRC       | 14,301,125,000  | 14,053,715,500    | 98.27              | 92.87                 | 87.13                 | 38.25                |
|                                           |                            | DL04        | SRS1273508 | <i>P. dulcis</i>                          | Wan Feng            | Xinjiang, PRC       | 13,945,222,250  | 13,648,189,000    | 97.87              | 92.24                 | 86.04                 | 38.03                |
|                                           |                            | DL05        | SRS1273509 | <i>P. dulcis</i>                          | Ai Feng             | Xinjiang, PRC       | 13,765,051,000  | 13,605,376,500    | 98.84              | 93.02                 | 87.29                 | 38.50                |
|                                           |                            | DL06        | SRS1273510 | <i>P. dulcis</i>                          | Ba Dan Wang         | Xinjiang, PRC       | 15,103,937,250  | 14,915,138,000    | 98.75              | 93.00                 | 87.39                 | 38.51                |
|                                           |                            | DL07        | SRS1273511 | <i>P. dulcis</i>                          | Huang Shuang        | Xinjiang, PRC       | 14,070,239,250  | 13,774,764,250    | 97.90              | 92.05                 | 85.75                 | 38.30                |
|                                           |                            | DL08        | SRS1273512 | <i>P. dulcis</i>                          | A Yue Hun Zi        | Xinjiang, PRC       | 14,069,751,500  | 13,846,042,500    | 98.41              | 92.47                 | 86.46                 | 38.02                |
|                                           |                            | DL09        | SRS1273513 | <i>P. dulcis</i>                          | Tao Ba Dan          | Xinjiang, PRC       | 14,611,473,000  | 14,342,622,000    | 98.16              | 92.31                 | 86.22                 | 38.09                |
|                                           |                            | DL10        | SRS1273514 | <i>P. dulcis</i>                          | Da Ba Dan           | Xinjiang, PRC       | 17,352,546,400  | 16,314,864,200    | 94.02              | 93.94                 | 85.10                 | 39.22                |
|                                           |                            | DL11        | SRS1273548 | <i>P. dulcis</i>                          | Ye Er Qiang         | Xinjiang, PRC       | 14,460,812,500  | 14,168,704,000    | 97.98              | 92.51                 | 86.59                 | 37.91                |
|                                           |                            | DL12        | SRS1273549 | <i>P. dulcis</i>                          | Bian Zui He         | Xinjiang, PRC       | 13,654,205,500  | 13,389,314,000    | 98.06              | 91.56                 | 84.84                 | 38.54                |
|                                           |                            | DMC13       | SRS1273551 | <i>P. dulcis</i>                          | Ao 2                | USA                 | 12,515,040,500  | 12,357,351,000    | 98.74              | 92.33                 | 86.19                 | 38.56                |
|                                           |                            | DMC14       | SRS1273552 | <i>P. dulcis</i>                          | Nonpareil           | USA                 | 18,284,527,200  | 17,346,531,000    | 94.87              | 94.36                 | 85.88                 | 38.70                |
|                                           |                            | DMC15       | SRS1273553 | <i>P. dulcis</i>                          | Mission             | USA                 | 13,144,457,250  | 12,981,466,000    | 98.76              | 92.31                 | 85.99                 | 38.64                |
| Other closely wild relatives in China (7) |                            | RW01        | SRS2510312 | <i>P. ledebouriana</i>                    | Ye Ba Dan           | Xinjiang, PRC       | 17,223,485,100  | 17,159,758,200    | 99.63              | 94.67                 | 88.94                 | 39.84                |
|                                           |                            | RW02        | SRS2510317 | <i>P. ledebouriana</i>                    | Ye Ba Dan           | Xinjiang, PRC       | 16,420,201,500  | 16,374,225,000    | 99.72              | 94.47                 | 88.55                 | 40.05                |
|                                           |                            | RW03        | SRS2510318 | <i>P. ledebouriana</i>                    | Ye Ba Dan           | Xinjiang, PRC       | 17,629,865,700  | 17,569,924,200    | 99.66              | 94.39                 | 88.43                 | 39.33                |
|                                           |                            | RW04        | SRS2510350 | <i>P. ledebouriana</i>                    | Ye Ba Dan           | Xinjiang, PRC       | 22,011,835,200  | 21,941,397,300    | 99.68              | 94.38                 | 88.39                 | 38.86                |
|                                           |                            | RW05        | SRS2510353 | <i>P. ledebouriana</i>                    | Ye Ba Dan           | Xinjiang, PRC       | 16,078,372,200  | 16,030,137,000    | 99.70              | 94.57                 | 88.67                 | 38.58                |
|                                           |                            | RW06        | SRS2510356 | <i>P. pedunculata</i>                     | Chang Bing Bian Tao | Shaanxi, PRC        | 20,196,355,600  | 19,165,040,000    | 94.89              | 94.31                 | 85.78                 | 38.72                |
|                                           |                            | RW07        | SRS2510357 | <i>P. triloba</i>                         | Yu Ye Mei           | Shannxi, PRC        | 18,213,517,600  | 17,356,470,200    | 95.29              | 94.91                 | 86.98                 | 38.86                |
| <b>Total</b>                              |                            |             |            |                                           |                     |                     | 699,886,739,750 | 676,649,618,100   | -                  | -                     | -                     | -                    |
| <b>Average</b>                            |                            |             |            |                                           |                     |                     | -               | -                 | -                  | 93.76                 | 86.65                 | 38.62                |

**Supplementary Table 3 Accuracy estimation of the identified SNPs from our sequencing data.**

| Sample code | Common name | Accuracy (%)    |                   |       |
|-------------|-------------|-----------------|-------------------|-------|
|             |             | Homozygous loci | Heterozygous loci | Total |
| PMC01       | Sunsplash_1 | 96.72           | 98.88             | 97.36 |
| PMC02       | Sunsplash_2 | 96.73           | 98.90             | 97.37 |
| PMC03       | Sunblaze    | 98.00           | 98.61             | 98.12 |
| PMC04       | Rui Pan 18  | 97.00           | 99.08             | 97.65 |

Supplementary Table 4 Genetic variation among or within cultivated peaches (CP), wild relative peaches (WP), and cultivated almond (CA)

| Group                        | CP     |        |        | WP     |        |        |         | CA    |
|------------------------------|--------|--------|--------|--------|--------|--------|---------|-------|
|                              | PL     | PMC    | Total  | WK     | WD     | WM     | Total   |       |
| $\theta\pi (\times 10^{-3})$ | 1.944  | 1.9431 | 2.1524 | 2.4056 | 9.6995 | 2.7782 | 10.0086 | 6.611 |
| Tajima's D                   | 0.5218 | 0.0078 | 0.1001 | -      | -      | -      | -       | -     |
| Comparison                   | WP/CP  |        | WP/PL  | PL/PMC |        | CA/CP  |         |       |
| $F_{ST}$                     | 0.2498 |        | 0.1863 | 0.1033 |        | 0.4378 |         |       |
| $\theta\pi$ Ratio            | 4.6499 |        | 5.1485 | 1.0004 |        | -      |         | -     |

Supplementary Table 5 Inbreeding coefficient ( $F$  value) and regions of homozygosity (ROHs) among *P. persica*, *P. kansuensis*, *P. davidiana*, *P. mira*, and *P. dulcis*

| Species              | ROHs                   |             |                  | F value |         |
|----------------------|------------------------|-------------|------------------|---------|---------|
|                      | Mean Total Length (Mb) | Mean Number | Mean length (kb) |         |         |
|                      | Total                  | 93.95       | 380.00           | 247.23  | 0.3192  |
| <i>P. persica</i>    | Landrace (PL)          | 128.82      | 532.00           | 242.14  | 0.3873  |
|                      | Cultivar (PMC)         | 76.51       | 304.00           | 251.68  | 0.1550  |
| <i>P. kansuensis</i> |                        | 86.04       | 498.50           | 172.61  | 0.0483  |
| <i>P. davidiana</i>  |                        | 8.95        | 58.33            | 153.47  | -0.0043 |
| <i>P. mira</i>       |                        | 73.32       | 454.60           | 161.28  | 0.1234  |
| <i>P. dulcis</i>     |                        | 6.84        | 47.33            | 144.50  | -0.0909 |

Supplementary Table 6 Statistics and distribution of CNVs for each accession of the 58 high-coverage genomes.

| Data set                                                                                                      | Group                 | Sample code                               | Common name                                  | Upstream | Exonic | Intronic | Downstream | Upstream/<br>Downstream | Intergenic | Duplication | Deletion   | Duplication | Deletion   | Total |
|---------------------------------------------------------------------------------------------------------------|-----------------------|-------------------------------------------|----------------------------------------------|----------|--------|----------|------------|-------------------------|------------|-------------|------------|-------------|------------|-------|
| Cultivated peaches                                                                                            |                       | PL01                                      | Kashi 2*                                     | 359      | 922    | 80       | 279        | 54                      | 2,254      | 810         | 3,304      | 5,868,400   | 14,252,900 | 4,114 |
|                                                                                                               |                       | PL02                                      | Kashi You Tao*                               | 356      | 960    | 83       | 306        | 53                      | 2,298      | 769         | 3,462      | 4,764,100   | 14,642,600 | 4,231 |
|                                                                                                               |                       | PL03                                      | Xinjiang Pan Tao*                            | 287      | 812    | 76       | 282        | 44                      | 2,240      | 895         | 2,994      | 6,165,200   | 13,378,400 | 3,889 |
|                                                                                                               |                       | PL04                                      | Pan Tao(Weihai)*                             | 290      | 784    | 70       | 226        | 48                      | 2,005      | 728         | 2,847      | 5,123,800   | 14,866,100 | 3,575 |
|                                                                                                               |                       | PL07                                      | Prunus ferganensis <sup>g</sup>              | 77       | 3,018  | 9        | 84         | 12                      | 990        | 3,394       | 851        | 95,427,200  | 7,588,000  | 4,245 |
|                                                                                                               |                       | PL05                                      | Mao Tao(Luanchuan)*                          | 279      | 690    | 64       | 218        | 40                      | 1,877      | 827         | 2,471      | 5,506,700   | 10,988,500 | 3,298 |
|                                                                                                               |                       | PL06                                      | You Tao(Jiyuan)*                             | 336      | 818    | 84       | 276        | 36                      | 2,334      | 844         | 3,200      | 4,916,200   | 14,478,800 | 4,044 |
|                                                                                                               |                       | PL08                                      | Sa Hua Hong Pan Tao <sup>h</sup>             | 188      | 546    | 33       | 153        | 31                      | 1,563      | 1,000       | 1,612      | 8,663,100   | 11,420,300 | 2,612 |
|                                                                                                               |                       | PL09                                      | Shen Zhou Mitao                              | 173      | 553    | 20       | 143        | 19                      | 1,545      | 1,266       | 1,248      | 12,485,100  | 8,623,700  | 2,514 |
|                                                                                                               |                       | PMC01                                     | Sunsplash_1*                                 | 264      | 600    | 56       | 202        | 48                      | 1,849      | 704         | 2,468      | 4,184,200   | 9,471,800  | 3,172 |
|                                                                                                               |                       | PMC02                                     | Sunplash_2*                                  | 247      | 610    | 53       | 204        | 41                      | 1,834      | 677         | 2,443      | 4,141,100   | 9,051,700  | 3,120 |
|                                                                                                               |                       | PMC03                                     | Sunblaze*                                    | 381      | 761    | 66       | 266        | 79                      | 2,044      | 696         | 3,112      | 4,027,100   | 14,002,300 | 3,808 |
|                                                                                                               |                       | PMC04                                     | Rui Pan 18*                                  | 253      | 598    | 66       | 162        | 34                      | 1,991      | 774         | 2,439      | 4,549,600   | 8,800,900  | 3,213 |
|                                                                                                               | PMC05                 | Oro A <sup>i</sup>                        | 127                                          | 491      | 20     | 116      | 23         | 1,209                   | 735        | 1,325       | 7,542,100  | 10,908,800  | 2,060      |       |
|                                                                                                               | PMC06                 | GF305 <sup>j</sup>                        | 121                                          | 377      | 28     | 119      | 17         | 1,240                   | 676        | 1,305       | 6,786,800  | 7,453,900   | 1,981      |       |
|                                                                                                               | PMC07                 | Bolero <sup>k</sup>                       | 107                                          | 363      | 21     | 70       | 15         | 988                     | 672        | 941         | 8,246,700  | 6,113,700   | 1,613      |       |
|                                                                                                               | PMC08                 | F1( Contender x Ambra) <sup>l</sup>       | 143                                          | 391      | 22     | 123      | 31         | 1,075                   | 745        | 1,141       | 8,905,600  | 6,390,000   | 1,886      |       |
|                                                                                                               | PMC09                 | IF7310828 <sup>m</sup>                    | 131                                          | 302      | 23     | 95       | 19         | 1,111                   | 585        | 1,151       | 6,401,300  | 6,169,700   | 1,736      |       |
|                                                                                                               | PMC10                 | Yumyeong <sup>n</sup>                     | 143                                          | 485      | 31     | 144      | 25         | 1,467                   | 779        | 1,591       | 5,673,300  | 9,931,800   | 2,370      |       |
|                                                                                                               | PMC11                 | Quetta <sup>o</sup>                       | 81                                           | 216      | 18     | 65       | 12         | 908                     | 440        | 907         | 4,610,000  | 4,745,200   | 1,347      |       |
|                                                                                                               | PMC12                 | Earligold <sup>p</sup>                    | 114                                          | 1,057    | 18     | 103      | 15         | 1,352                   | 1,742      | 990         | 14,934,800 | 5,337,800   | 2,732      |       |
|                                                                                                               | PMC13                 | PLov2-2Nc (Reference genome) <sup>q</sup> | 227                                          | 277      | 48     | 167      | 36         | 1,527                   | 402        | 2,013       | 2,721,600  | 4,874,800   | 2,415      |       |
| 58 high-coverage genomes including 44 genomes sequenced in this study and 14 genomes from Verde et al. (2013) | Wild relative peaches | WK01                                      | Bai Gen Gan Su Tao*                          | 580      | 1,637  | 96       | 447        | 101                     | 3,242      | 974         | 5,421      | 5,365,800   | 31,718,800 | 6,395 |
|                                                                                                               |                       | WK02                                      | Hong Gen Gan Su Tao*                         | 561      | 1,647  | 103      | 445        | 104                     | 3,284      | 1,057       | 5,372      | 6,017,000   | 29,609,100 | 6,429 |
|                                                                                                               |                       | WK03                                      | Prunus kansuensis (Clone P1429) <sup>r</sup> | 207      | 1,433  | 15       | 164        | 26                      | 1,478      | 1,154       | 2,317      | 16,706,500  | 22,097,100 | 3,471 |
|                                                                                                               |                       | WD01                                      | Meng Gu Bian Tao*                            | 603      | 1,599  | 60       | 406        | 103                     | 2,576      | 848         | 4,800      | 4,575,900   | 36,546,400 | 5,648 |
|                                                                                                               |                       | WD02                                      | Xi Kang Bian Tao*                            | 689      | 1,871  | 84       | 523        | 107                     | 3,483      | 956         | 6,158      | 4,907,600   | 36,725,100 | 7,114 |
|                                                                                                               |                       | WD03                                      | Bai Hua Shan Tao*                            | 558      | 1,602  | 73       | 400        | 108                     | 2,561      | 940         | 4,610      | 6,305,300   | 34,682,900 | 5,550 |
|                                                                                                               |                       | WD04                                      | Hong Hua Shan Tao*                           | 602      | 1,700  | 78       | 440        | 108                     | 2,948      | 994         | 5,179      | 6,581,900   | 36,334,200 | 6,173 |
|                                                                                                               |                       | WD05                                      | Prunus davidiana (Clone P 1908) <sup>s</sup> | 297      | 1,503  | 29       | 245        | 57                      | 1,778      | 1,110       | 3,022      | 11,486,300  | 28,029,800 | 4,132 |
|                                                                                                               |                       | WD06                                      | Shan Gan Shan Tao*                           | 556      | 1,586  | 62       | 402        | 108                     | 2,583      | 955         | 4,626      | 5,892,600   | 33,234,100 | 5,581 |
|                                                                                                               |                       | WM01                                      | Guang He Tao*                                | 794      | 1,823  | 106      | 533        | 129                     | 3,513      | 978         | 6,303      | 5,367,700   | 36,653,700 | 7,281 |
|                                                                                                               |                       | WM02                                      | Guang He Tao*                                | 775      | 1,839  | 108      | 533        | 137                     | 4,032      | 964         | 6,863      | 4,961,800   | 39,552,400 | 7,827 |
|                                                                                                               |                       | WM03                                      | Guang He Tao*                                | 768      | 1,810  | 103      | 535        | 127                     | 4,088      | 970         | 6,873      | 5,167,500   | 39,219,700 | 7,843 |
|                                                                                                               |                       | WM04                                      | Guang He Tao*                                | 376      | 2,196  | 26       | 256        | 74                      | 2,258      | 1,790       | 3,660      | 25,876,200  | 28,885,400 | 5,450 |
| WM05                                                                                                          | Guang He Tao*         | 677                                       | 1,697                                        | 84       | 442    | 109      | 3,550      | 971                     | 5,932      | 5,553,400   | 36,034,900 | 6,903       |            |       |
| Cultivated almonds                                                                                            | DL01                  | Shuang Guo*                               | 627                                          | 1,846    | 92     | 406      | 114        | 3,255                   | 966        | 5,670       | 5,240,900  | 35,880,900  | 6,636      |       |
|                                                                                                               | DL02                  | Zhi Pi*                                   | 546                                          | 1,809    | 71     | 387      | 97         | 3,029                   | 993        | 5,214       | 5,829,600  | 34,113,700  | 6,207      |       |
|                                                                                                               | DL03                  | Gong Ba Dan*                              | 567                                          | 1,862    | 75     | 397      | 105        | 3,023                   | 984        | 5,331       | 5,707,500  | 34,813,100  | 6,315      |       |
|                                                                                                               | DL04                  | Wan Feng*                                 | 580                                          | 1,840    | 89     | 418      | 102        | 3,001                   | 1,017      | 5,301       | 5,801,700  | 34,674,300  | 6,318      |       |
|                                                                                                               | DL05                  | Ai Feng*                                  | 546                                          | 1,854    | 83     | 419      | 108        | 2,933                   | 955        | 5,277       | 5,721,300  | 35,541,200  | 6,232      |       |
|                                                                                                               | DL06                  | Ba Dan Wang*                              | 660                                          | 1,831    | 84     | 432      | 112        | 3,257                   | 942        | 5,708       | 5,272,700  | 35,604,900  | 6,650      |       |
|                                                                                                               | DL07                  | Huang Shuang*                             | 486                                          | 1,801    | 66     | 373      | 89         | 2,508                   | 950        | 4,621       | 6,029,100  | 33,242,600  | 5,571      |       |
|                                                                                                               | DL08                  | A Yue Hun Zi*                             | 575                                          | 1,817    | 63     | 400      | 102        | 2,921                   | 937        | 5,195       | 5,663,200  | 33,906,500  | 6,132      |       |
|                                                                                                               | DL09                  | Tao Ba Dan*                               | 586                                          | 1,888    | 67     | 402      | 101        | 2,911                   | 974        | 5,270       | 5,529,400  | 35,553,300  | 6,244      |       |
|                                                                                                               | DL10                  | Da Ba Dan*                                | 479                                          | 1,707    | 48     | 314      | 82         | 2,239                   | 948        | 4,155       | 6,715,200  | 32,440,100  | 5,103      |       |
|                                                                                                               | DL11                  | Ye Er Qiang*                              | 623                                          | 1,941    | 94     | 410      | 109        | 3,413                   | 1,025      | 5,871       | 5,654,500  | 36,061,200  | 6,896      |       |
|                                                                                                               | DL12                  | Bian Zui He*                              | 432                                          | 1,736    | 45     | 321      | 88         | 2,239                   | 994        | 4,129       | 6,800,200  | 32,213,200  | 5,123      |       |
|                                                                                                               | DMC13                 | Ao 2*                                     | 452                                          | 1,694    | 48     | 306      | 90         | 2,132                   | 945        | 4,012       | 6,743,000  | 31,662,200  | 4,957      |       |
| DMC14                                                                                                         | Nonpareil*            | 526                                       | 1,734                                        | 72       | 354    | 94       | 2,409      | 955                     | 4,498      | 5,929,800   | 32,881,100 | 5,453       |            |       |
| DMC15                                                                                                         | Mission*              | 441                                       | 1,685                                        | 56       | 326    | 88       | 2,322      | 942                     | 4,240      | 6,559,300   | 32,143,500 | 5,182       |            |       |
| Other wild relatives                                                                                          | RW01                  | Ye Ba Dan*                                | 410                                          | 1,747    | 43     | 257      | 93         | 1,421                   | 494        | 3,790       | 4,627,900  | 47,347,000  | 4,284      |       |
|                                                                                                               | RW02                  | Ye Ba Dan*                                | 445                                          | 1,812    | 41     | 242      | 106        | 1,463                   | 546        | 3,921       | 5,715,100  | 47,363,400  | 4,467      |       |
|                                                                                                               | RW03                  | Ye Ba Dan*                                | 433                                          | 1,794    | 57     | 282      | 104        | 1,582                   | 474        | 4,107       | 3,066,500  | 49,783,900  | 4,581      |       |
|                                                                                                               | RW04                  | Ye Ba Dan*                                | 481                                          | 1,811    | 47     | 280      | 95         | 1,646                   | 495        | 4,181       | 3,169,300  | 51,117,300  | 4,676      |       |
|                                                                                                               | RW05                  | Ye Ba Dan*                                | 524                                          | 1,894    | 65     | 335      | 135        | 1,680                   | 464        | 4,534       | 2,412,900  | 54,727,700  | 4,998      |       |

The samples with >10<sup>x</sup> sequencing depth were marked with \* and <sup>g</sup> were used for subsequent analyses<sup>h</sup> Raw data were generated in this study<sup>i</sup> Raw data were downloaded from Verde et al. 2013



## Supplementary Notes

### Supplementary Note 1 Phylogenetic analysis of the 58 samples along with *P. mume*

A phylogenetic analysis based on the 58 samples along with *P. mume* (belonging to the genus *Prunus* subgenus *Prunus*) placed *P. ledebouriana*, *P. triloba*, *P. pedunculata*, and *P. mume* into separate clades from the well-established monophyletic *Prunus* subg. *Amygdalus* clade (Supplementary Fig. 2). This is evident on the basis of genome-wide SNPs strongly support the previous taxonomy and classification which addressed that *P. triloba* and *P. pedunculata* should be excluded from subgenus *Amygdalus* mainly on the basis of chloroplast DNA sequences<sup>1</sup>, although *P. pedunculata* and *P. trilob*, both of which belong to a sister clade of the peach (*Persica* section) clade in phylogenetic analysis of morphological data<sup>1</sup>. Despite the fact that small shrub *P. ledebouriana* (previously named ‘wild almond’, endemic to the valleys of Barlikhtaw, Tarbagatai and Altai Mountains of north to Tian Shan Mountains in central Asia, northern Xinjiang, northwest China) shares a close geographic distribution with cultivated almond *P. dulcis* which mainly resides in southwest to Tian Shan Mountains, southern Xinjiang, these two species showed no closely affinity as was previously thought. Therefore, *P. triloba*, *P. pedunculata*, along with *P. mume* were not included in subsequent analyses, whereas *P. ledebouriana* was used as the outgroup for the analyses of population structure in *Prunus* subg. *Amygdalus* species.

## **Supplementary Note 2 An increased inbreeding level in edible peach species associated with selection for favorite fruit traits**

It is now understood that there is no absolute self-compatible (SC) or self-incompatible (SI) peach species, even cultivated peach (*P. persica*), defined as SC species, has cross-pollinator cultivars owing to male sterility<sup>2</sup>. Hence, it is more accurate to state that the SI peach species like *P. mongolica*, *P. tangutica*, and *P. davidiana* hold much lower inbreeding levels compared to that of *P. mira*, and *P. kansuensis*, and *P. persica* which considered as a SC species shows the highest inbreeding level among these peach species (supported by our analyses of the extent of ROHs, F-value, and heterozygosity results). As SI is predominant in *Prunus* and SC is derived from diverse types of dysfunction mutants in S-locus (also including the natural mutations associated with transposable elements (TEs) insertion<sup>3</sup>) of these *Prunus* species, we considered that the population of SC was increased (reflecting on the increasing of inbreeding) when selection was exerted on these three edible peach species: it is conceivable that frugivores could exert selection based on fruit characters but not the mating system of peach species. However, maintaining favorable fruit traits have been strongly impacted by the higher inbreeding levels of these peach species. Thus, these two domestication syndromes (inbreeding level and improved fruit edibility) were related during the evolution of peach species.

### Supplementary Note 3 Granger causality test for assessing $N_e$ trend similarity between monkey and peach species

The Granger causality (GC) test was applied to assess if there is a similar trend in the effective population size ( $N_e$ ) between the three different monkey species and the five peach species across different age periods. GC test is a statistical hypothesis test commonly applied in time series analysis aimed to determine whether one time series is capable in predicting another, first proposed by Granger (1969)<sup>4</sup>. In our application, we tried to test if the monkey  $N_e$  can predict the  $N_e$  change in *P. dulcis* and the peach species (*P. mira*, *P. davidiana*, *P. kansuensis*, and *P. persica*). The significant test results implied that the  $N_e$  of the each of the southwest monkey species (*Rhinopithecus brelichii* and *R. bieti*) can be used to predict the  $N_e$  trajectories of the three edible peach species (*P. mira*, *P. kansuensis*, and *P. persica*). The GC test was performed using the `grangertest()` function implemented in the `lmtest` package in R.

Table P-value for testing the trend similarity between monkey and peach species

| Monkey species      | Time range (Thousand years ago) | <i>P. dulcis</i> | <i>P. mira</i> | <i>P. davidiana</i> | <i>P. kansuensis</i> | <i>P. persica</i> |
|---------------------|---------------------------------|------------------|----------------|---------------------|----------------------|-------------------|
| <i>R. brelichii</i> | 8–900                           | 0.33             | 0.005**        | 0.368               | 0.003**              | 0.0029**          |
| <i>R. bieti</i>     | 8–900                           | 0.23             | 0.017*         | 0.50                | 0.004**              | 0.002**           |
| <i>R. strykeri</i>  | 8–500                           | 0.276            | 0.051          | 0.92                | 0.133                | 0.101             |

(\*:  $P \leq 0.05$ ; \*\*:  $P \leq 0.01$ )

**Supplementary Note 4 Phylogenetic relationship and evolved edible mesocarp in *Persica* section species**

Two phylogenetic tree based on the data from Yazbek *et al.*, 2014 (a) and the result from our study (b) are shown below. The assumed common ancestors of *Amygdalus* and *Persica* sections' species are SI and bears dry, splitting inedible mesocarps<sup>5,6</sup>, and the transition from inedible mesocarps to edible mesocarps occurred in *Persica* section species. Two subclades, including inedible- and edible-mesocarp species are shown on the phylogenetic tree (a), and *P. davidiana* represents as a transition between peaches species with fleshy-non-splitting and dry-splitting mesocarp<sup>5,6</sup>. Our result suggested that *P. mira* was the earliest diverged wild relative species in *Persica* section, and the evolved edible mesocarp in *P. mira* likely contributed by the introgression from the common ancestor of *P. kansuensis* and *P. persica*.

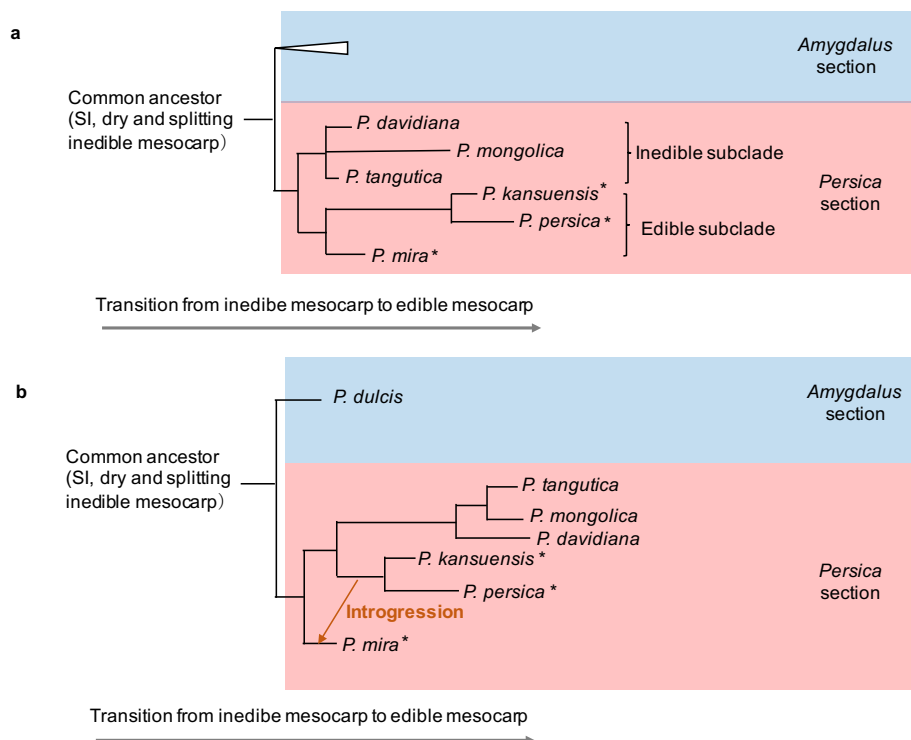

**Supplementary Note 5 Maintenance of favorable traits in self-incompatible (cross-pollinated) species is harder than in self-compatible (inbreeding) species**

The increased diversity and heterozygosity of self-incompatible (cross-pollinated) species may bring evolutionary advantage with increased survival probability of their progeny in changing environmental or stress conditions, in this case *P. mongolica*, *P. tangutica*, and *P. davidiana* in *Persica* section. However, under long-term open pollination conditions, high heterozygosity will also impair the maintenance of favorable traits, leading to phenotypic differentiation, thus hindered the evolution of fruit traits.

### **Supplementary Note 6 *P. mira* and *P. kansuensis* are staying at pre-domestication stage**

In addition to *P. persica*, there are two other peach species bearing edible fleshy mesocarps: *P. mira* (also known as “Tibetan peach”) and *P. kansuensis* (also named as “juicy peach” in Shaanxi, Gansu, and Shanxi province). These two wild relatives are mostly distributed in natural forests, and fruit is occasionally gathered by humans, yet without intentional selection. It has been proposed that the definition of plant domestication should refer to more concrete, positive human intervention<sup>7</sup>. In this process, changes in cultivation habitat (adaptation) and choosing individuals with favorable traits for cultivation (selection) are critical. However, fruit gathering from a natural forest would not be considered as a domestication process with such assumptions (like the scenario of kiwifruit whose edible fruit has been occasionally collected in western China for human consumption, while the actual adaptation and cultivation of kiwifruit took place only during the twentieth century in New Zealand<sup>8</sup>).

A “home garden” cultivation for perennial fruit trees is also distinct from the domestication of grain and pulse crops, since a relatively short-distance shifting of habitat and a weak selection occurred due to very a limited number of cultivation individuals (even a single tree could provide food for whole family), and the long generation time. This supports a statement that these kind of species, in this case *P. mira* and *P. kansuensis*, may have experienced a selection process (likely mediated by frugivores) but still did not undergo a domestication mediated by humans, representing a fascinating pre-domestication stage.

## References

1. Yazbek, M. & Oh, S.H. Peaches and almonds: phylogeny of *Prunus* subg. *Amygdalus* (Rosaceae) based on DNA sequences and morphology. *Plant Syst. Evol.* **299**, 1403–1418 (2013).
2. Loreti, F. & Morini, S. Propagation techniques. In: Layne DR, Bassi D, editors. *The Peach: Botany, Production and Uses*. Wallingford: CABI. 221–243 (2008).
3. Halász, J., Kodad, O. & Hegedűs, A. Identification of a recently active *Prunus*-specific non-autonomous Mutator element with considerable genome shaping force. *Plant J.* **79**, 220–231(2014).
4. Granger, C. W. Investigating Causal Relations by Econometric Models and Cross-spectral Methods. *Econometrica* **37**, 424–438 (1969).
5. Yazbek, M. & Oh, S.H. Peaches and almonds: phylogeny of *Prunus* subg. *Amygdalus* (Rosaceae) based on DNA sequences and morphology. *Plant Syst. Evol.* **299**, 1403–1418 (2013).
6. Yazbek, M.M. & Al-Zein, M.S. Wild almonds gone wild: revisiting Darwin's statement on the origin of peaches. *Genet. Resour. Crop Evol.* **61**, 1319–1328 (2014).
7. Janick, J. The origin of fruits, fruit growing and fruit breeding. *Plant Breeding Reviews* **25**, 255–320 (2005).
8. Huang, H. W. & A. R. Ferguson. Genetic resources of kiwifruit domestication and breeding. *Horticultural Reviews* **33**,1–121 (2007).
